# Supplementary material for: Identifying the “Active Ingredients” of a School-Based, Workplace Safety and Health Training Intervention
Source: Prev Sci. Author manuscript; Available in PMC 2022 Oct 1. (PMC8458184; doi:10.1007/s11121-021-01209-8)
Supplement: Suppl Material [file NIHMS1680327-supplement-Suppl_Material.pdf]

## Identifying the “active ingredients” of a school-based, workplace safety and health training intervention

Mikko Nykänen, Rebecca J. Guerin & Jukka Vuori

### Online resource A. Standardized factor loadings of intervention core components

| Core component                                                                                                | Core component evaluation questionnaire items                      | Standardized factor loading |
|---------------------------------------------------------------------------------------------------------------|--------------------------------------------------------------------|-----------------------------|
| Safety skills training<br>( <i>How much did you practice...?</i> )                                            | how to identify occupational hazards.                              | 0.788                       |
|                                                                                                               | how to prevent occupational hazards or incidents.                  | 0.841                       |
|                                                                                                               | safe working methods                                               | 0.686                       |
|                                                                                                               | how to report dangerous situations or safety deviations            | 0.825                       |
|                                                                                                               | how to seek information and support at the workplace               | 0.691                       |
| Safety inoculation training<br>( <i>How much did you discuss solutions for the following situations...?</i> ) | unexpected event or machine malfunction at the workplace           | 0.849                       |
|                                                                                                               | negative attitudes towards occupational safety at the workplace    | 0.878                       |
|                                                                                                               | employee is not sure how to perform the work task                  | 0.695                       |
| Positive learning atmosphere<br>( <i>To what extent...?</i> )                                                 | was the atmosphere positive and inspiring during the training      | 0.784                       |
|                                                                                                               | were you inspired to improve occupational safety                   | 0.838                       |
|                                                                                                               | was it easy for to talk about your own ideas or experiences        | 0.762                       |
| Active learning techniques<br>( <i>How much did ...?</i> )                                                    | you work in small groups                                           | 0.644                       |
|                                                                                                               | you did role-playing exercises that simulated practical situations | 0.464                       |
|                                                                                                               | you get involved in planning ways to improve occupational safety   | 0.740                       |
|                                                                                                               | the trainer ask for your ideas or suggestions during the exercises | 0.801                       |
|                                                                                                               | the trainer ask you questions that encouraged discussion           | 0.840                       |
